# Supplementary material for: PRDX4 Can Potentially Serve as an Independent Prognostic Marker for Early Recurrence of Oral Squamous Cell Carcinoma
Source: Research Square preprint supplement (doi:10.21203/rs.3.rs-7744178/v1), 2025-10-08
Supplement: Supplementary file 1 [file 88a248b01a67dcb8f06a42b2.xlsx]

## Sheet: Tablet3
Table 3 The univariate analyses of RFS according to the clinicopathological variables and the expression of PRDX4 and β-catenin
	Univariate
	Hazard ratio	95% CI	p value
Sex	0.7191	0.2605 - 1.985	0.5245
Age (years)	0.7785	0.2807 - 2.159	0.6303
Maximal tumor diameter (mm)	2.808	0.949 - 8.31	0.06213
Differentiation	0.4882	0.06388 - 3.731	0.4896
pT	1.839	0.6258 - 5.402	0.2681
Lymph node metastasis	1.958	0.6682 - 5.74	0.2205
Distant metastasis	1.169	0.1521 - 8.981	0.8808
Lymphatic invasion	0.8441	0.238 - 2.994	0.7931
Venous invasion	0.9947	0.279 -3.546	0.9935
Perineural invasion	3.085	1.091 - 8.727	0.03371
Smoking history	0.9302	0.5696 -1.519	0.7725
Drinking history	1.057	0.6733 - 1.659	0.8099
PRDX4-IHC	6.2	0.815 - 47.17	0.07801
β-catenin-IHC	0.9129	0.3306 - 2.521	0.8604
	Multivariate
	Hazard ratio	95% CI	p value
Maximal tumor diameter (mm)	3.472	1.140 - 10.580	0.02854
Perineural invasion	3.431	1.183 - 9.949	0.02323
PRDX4-IHC	8.016	1.028 - 62.490	0.04695
