# Supplementary material for: PRDX4 Can Potentially Serve as an Independent Prognostic Marker for Early Recurrence of Oral Squamous Cell Carcinoma
Source: Research Square preprint supplement (doi:10.21203/rs.3.rs-7744178/v1), 2025-10-08
Supplement: Supplementary file 2 [file 9960076ba78ef084ff214c86.xlsx]

## Sheet: Table2
Table 2 Correlations between PRDX4 expression levels and clinicopathological variables
	PRDX4		p value		β-catenin		p value		Coexpression		p value
	Low	High			Low	High			High-High	Others
	(n = 21)	(n = 51)			(n = 31)	(n = 41)			(n=29)	(n=43)
Sex
Female	11	17	0.132		17	11	0.016		6	22	0.009
Male	10	34			14	30			23	21
Age (years)
< 60	7	20	0.639		11	16	0.759		10	17	0.664
≥ 60	14	31			20	25			19	26
Differentiation
Well to moderate	21	48	0.256		30	39	0.728		27	42	0.341
Poor	0	3			1	2			2	1
Maximal tumor diameter (mm)
< 30	16	42	0.548		24	34	0.559		24	34	0.388
≥ 30	5	9			7	7			5	9
pT
< 2	9	23	0.862		10	22	0.07		13	16	0.518
≥ 2	12	28			21	19			16	27
Lymph node metastasis
Absent	18	33	0.075		21	30	0.616		18	33	0.179
Present	3	18			10	11			11	10
Distant metastasis
Absent	20	47	0.64		31	36	0.044		24	42	0.054
Present	1	4			0	5			4	1
Lymphatic invasion
Absent	18	37	0.232		26	29	0.194		19	36	0.074
Present	3	14			5	12			10	7
Venous invasion
Absent	16	38	0.881		24	30	0.68		21	33	0.677
Present	5	13			7	11			8	10
Perineural invasion
Absent	17	39	0.678		25	31	0.611		22	34	0.748
Present	4	12			6	10			7	9
Smoking history
Absent	14	15	0.003		11	8	0.178		3	16	0.013
Present	7	36			14	22			18	18
Drinking history
Absent	13	13	0.003		6	6	1		2	10	0.208
Present	8	38			18	18			13	23
Recurrence
Absent	20	37	0.031		24	33	0.751		21	36	0.247
Present	1	14			7	8			8	7
PRDX4-IHC
Low					9	12	0.728
High					20	28
β-catenin-IHC
Low	10	22	0.728
High	11	29
