# Supplementary material for: PRDX4 Can Potentially Serve as an Independent Prognostic Marker for Early Recurrence of Oral Squamous Cell Carcinoma
Source: Research Square preprint supplement (doi:10.21203/rs.3.rs-7744178/v1), 2025-10-08
Supplement: Supplementary file 3 [file 996fce83e638ea4bffc7ab81.xlsx]

## Sheet: Table1
Table 1 The clinicopathological characteristics of the OSCC patients
Characteristics	Patients (n=72)
Sex
Female	28
Male	44
Age (years)
< 60	27
≥ 60	45
Maximal tumor diameter (mm)
< 30	58
≥ 30	14
Differentiation
Well to moderate	69
Poor	3
pT
< 2	40
≥ 2	32
Lymph node metastasis
Absent	51
Present	21
Distant metastasis
Absent	67
Present	5
Lymphatic invasion
Absent	55
Present	17
Venous invasion
Absent	54
Present	18
Perineural invasion
Absent	56
Present	16
Smoking history
Absent	21
Present	51
Drinking history
Absent	26
Present	46
Recurrence
Absent	57
Present	15
PRDX4-IHC
Low	21
High	51
β-catenin-IHC
Low	31
High	41
