# Supplementary material for: PRDX4 Can Potentially Serve as an Independent Prognostic Marker for Early Recurrence of Oral Squamous Cell Carcinoma
Source: Research Square preprint supplement (doi:10.21203/rs.3.rs-7744178/v1), 2025-10-08
Supplement: Supplementary file 4 [file b6e1b84c734ba57b937a1100.xlsx]

## Sheet: Sheet1
Table 1. The detailed relationships among the PRDX4 expression, b-catenin accumulation and each patients' variables
	No.	Recurrence	Metastasis	PRDX4 expression	b-catenin accumulation	Age (yrs)	Sex	Location	Smorking	Drinking	Lyphatic invasion	Venous invasion	Perineural invasion	T Category	N Category
	1	-	-	Low	High	41	Female	Tongue	-	+	-	-	-	3	0
	2	-	-	High	High	41	Male	Tongue	+	+	-	-	-	1	0
	3	-	-	Low	High	50	Male	Floor of mouth	+	-	-	-	-	0	0
	4	-	-	Low	High	56	Female	Tongue	-	-	-	-	-	2	1
	5	-	-	Low	Low	82	Female	Tongue	-	-	-	-	-	2	0
	6	-	-	High	High	75	Male	Tongue	+	+	-	-	-	2	0
	7	-	-	High	Low	54	Male	Tongue	-	+	-	-	-	2	0
	8	+	-	Low	Low	70	Female	Tongue	-	-	-	+	+	is	0
	9	-	+	High	High	59	Male	Tongue	+	+	-	-	-	2	0
	10	-	-	High	Low	90	Female	Tongue	-	-	-	-	-	2	0
	11	-	-	High	High	67	Male	Tongue	+	+	-	-	-	2	0
	12	-	-	High	Low	70	Female	Tongue	+	+	+	+	-	2	0
	13	-	-	Low	High	60	Female	Tongue	-	+	-	+	-	1	0
	14	-	-	High	High	59	Male	Floor of mouth	+	+	-	-	-	0	0
	15	-	-	Low	High	85	Male	Tongue	-	-	-	-	-	1	0
	16	-	-	High	High	36	Male	Tongue	+	-	-	-	-	1	0
	17	-	+	High	High	68	Male	Tongue	+	+	-	-	-	1	0
	18	-	-	High	High	68	Male	Floor of mouth	+	+	-	-	-	1	0
	19	-	-	High	High	56	Female	Tongue	-	-	-	-	-	1	0
	20	+	-	High	High	49	Male	Tongue	+	+	+	-	-	2	0
	21	+	-	High	Low	58	Male	Tongue	+	+	-	-	+	3	2b
	22	+	-	High	High	65	Male	Tongue	+	+	-	-	-	2	0
	23	-	-	High	High	81	Male	Tongue	+	-	-	-	-	1	0
	24	-	-	Low	High	53	Female	Tongue	-	-	+	-	-	1	0
	25	-	-	High	High	72	Male	Floor of mouth	+	+	-	-	-	1	0
	26	-	-	High	High	77	Male	Tongue	+	+	-	-	-	2	2b
	27	-	-	High	High	63	Male	Tongue	-	-	-	+	-	2	0
	28	+	+	High	High	45	Female	Floor of mouth	-	+	-	-	-	4a	2b
	29	-	+	Low	High	69	Male	Tongue	+	-	-	-	-	3	0
	30	-	-	High	High	67	Male	Floor of mouth	+	+	-	-	-	1	0
	31	-	-	High	Low	73	Male	Tongue	-	+	-	-	-	2	0
	32	-	-	High	High	69	Male	Tongue	+	+	-	-	-	2	2b
	33	+	-	High	Low	64	Female	Maxilla	-	-	-	+	-	3	0
	34	-	-	High	High	61	Male	Floor of mouth	+	+	-	-	-	1	1
	35	-	-	High	High	61	Male	Floor of mouth	+	-	-	-	+	4a	3a
	36	-	-	Low	Low	69	Male	Floor of mouth	+	+	-	-	-	1	0
	37	-	-	High	High	81	Female	Tongue	+	+	-	-	-	2	0
	38	-	-	Low	High	62	Male	Tongue	-	+	-	+	+	1	0
	39	-	-	High	Low	56	Male	Tongue	+	+	-	-	+	2	0
	40	-	-	Low	High	59	Male	Floor of mouth	-	+	+	+	-	2	0
	41	-	-	High	Low	72	Female	Tongue	+	+	+	+	+	is	0
	42	-	-	Low	Low	34	Female	Tongue	-	+	+	+	+	1	0
	43	+	-	High	Low	81	Female	Mandible	-	-	-	-	-	4a	0
	44	+	-	High	Low	40	Male	Tongue	-	+	+	-	+	2	0
	45	-	-	Low	Low	64	Female	Mandible	-	-	+	-	+	4a	0
	46	-	-	Low	Low	80	Female	Floor of mouth	-	-	-	-	-	2	1
	47	-	-	Low	Low	93	Female	Buccal	-	-	+	+	-	2	0
	48	-	-	Low	High	29	Female	Tongue	-	-	-	-	-	1	0
	49	-	+	High	High	71	Male	Floor of mouth	+	+	+	+	+	1	2b
	50	-	-	High	Low	74	Male	Mandible	+	+	-	-	-	1	0
	51	-	-	Low	High	64	Male	Floor of mouth	+	+	+	-	-	2	0
	52	-	-	Low	Low	81	Male	Floor of mouth	+	+	-	+	-	3	0
	53	-	-	Low	High	79	Male	Mandible	+	+	+	-	+	2	0
	54	+	-	High	High	92	Female	Mandible	-	-	+	+	+	4a	2a
	55	-	-	High	Low	63	Male	Tongue	+	+	-	-	-	2	3b
	56	-	-	High	Low	73	Male	Maxilla	+	+	-	-	-	2	0
	57	-	-	High	Low	48	Female	Tongue	-	+	-	-	+	0	0
	58	-	-	Low	Low	73	Male	Maxilla	+	+	-	+	-	4a	3b
	59	-	-	High	High	26	Female	Tongue	-	-	-	-	-	0	0
	60	-	-	High	High	69	Male	Tongue	+	+	-	-	-	1	2b
	61	-	-	High	Low	51	Female	Tongue	-	+	-	-	-	3	0
	62	+	-	High	High	40	Male	Tongue	+	+	+	-	-	1	0
	63	-	-	High	Low	49	Female	Tongue	+	+	-	+	-	0	1
	64	-	-	High	Low	66	Male	Tongue	-	+	-	-	-	3	0
	65	+	-	High	High	45	Male	Tongue	+	+	-	-	-	1	0
	66	+	-	High	High	68	Female	Tongue	-	+	+	+	+	1	0
	67	+	-	High	Low	43	Male	Tongue	+	+	-	-	-	3	1
	68	-	-	High	Low	62	Female	Tongue	+	+	+	-	+	4a	1
	69	+	-	High	High	73	Male	Tongue	+	+	-	-	-	4a	1
	70	+	-	High	Low	78	Female	Buccal	+	+	+	+	+	1	0
	71	-	-	High	Low	41	Female	Tongue	+	+	-	-	-	2	0
	72	-	-	High	Low	37	Male	Tongue	+	+	+	-	-	1	0
